# Supplementary material for: Venous Thromboembolism in an Industrial North American City: Temporal Distribution and Association with Particulate Matter Air Pollution
Source: PubMed Central journal article supplement (PMC3707887; doi:10.1371/journal.pone.0068829), 2013-07-10
Supplement: pone.0068829.s001.pdf [file pone.0068829.s001.pdf]

## Detroit VTE cases

| month      | M# | DOY   | R'DOY | sin'DOY | cos'DOY | #VTEs | sum sin      | sum cos       | CF   | rel. CF | uniform dist | diff    |
|------------|----|-------|-------|---------|---------|-------|--------------|---------------|------|---------|--------------|---------|
| Jan        | 1  | 14.5  | 0.250 | 0.247   | 0.969   | 114   | 28.16        | 110.47        | 114  | 0.0765  | 0.0833       | -0.0068 |
| Feb        | 2  | 45.5  | 0.783 | 0.706   | 0.709   | 104   | 73.38        | 73.70         | 218  | 0.1463  | 0.1667       | -0.0204 |
| Mar        | 3  | 73.5  | 1.265 | 0.954   | 0.301   | 119   | 113.49       | 35.80         | 337  | 0.2262  | 0.2500       | -0.0238 |
| Apr        | 4  | 104.5 | 1.799 | 0.974   | -0.226  | 139   | 135.40       | -31.43        | 476  | 0.3195  | 0.3333       | -0.0139 |
| May        | 5  | 134.5 | 2.315 | 0.735   | -0.678  | 126   | 92.66        | -85.38        | 602  | 0.4040  | 0.4167       | -0.0126 |
| June       | 6  | 165.5 | 2.849 | 0.288   | -0.957  | 136   | 39.23        | -130.22       | 738  | 0.4953  | 0.5000       | -0.0047 |
| July       | 7  | 195.5 | 3.365 | -0.222  | -0.975  | 153   | -33.96       | -149.18       | 891  | 0.5980  | 0.5833       | 0.0147  |
| Aug        | 8  | 226.5 | 3.899 | -0.687  | -0.727  | 137   | -94.13       | -99.54        | 1028 | 0.6899  | 0.6667       | 0.0233  |
| Sept       | 9  | 257.5 | 4.433 | -0.961  | -0.276  | 111   | -106.69      | -30.65        | 1139 | 0.7644  | 0.7500       | 0.0144  |
| Oct        | 10 | 287.5 | 4.949 | -0.972  | 0.235   | 117   | -113.74      | 27.44         | 1256 | 0.8430  | 0.8333       | 0.0096  |
| Nov        | 11 | 318.5 | 5.483 | -0.718  | 0.696   | 131   | -94.01       | 91.23         | 1387 | 0.9309  | 0.9167       | 0.0142  |
| Dec        | 12 | 348.5 | 5.999 | -0.280  | 0.960   | 103   | -28.86       | 98.87         | 1490 | 1.0000  | 1.0000       | 0.0000  |
| <b>SUM</b> |    |       |       |         |         |       | <b>10.94</b> | <b>-88.91</b> |      |         |              |         |

**DOY** – day of year; January 1<sup>st</sup> = 0 and Dec 31<sup>st</sup> = 364; the mid-point of each month is used as the DOY

**R'DOY** – the angle of the DOY expressed in radians; the DOY is first converted to an angle in degrees and then to radians

$$14.5 \text{ days} = 14.5 (360/364) \text{ degrees} = 14.34 \text{ degrees} = 14.34 (2\pi/360) \text{ radians} = 0.250 \text{ radians}$$

**sin'DOY** – the sine of the DOY

**cos'DOY** – the cosine of the DOY

**#VTEs** – the number of VTE cases that occurred in each month over the duration of the study

**sum sin** – sum of the sines for the number of VTE cases in each month; for January,  $0.247 * 114 = 28.16$

**sum cos** – sum of the cosines for the number of VTE cases in each month; for January,  $0.969 * 114 = 110.47$

**CF** – cumulative frequency of the VTE cases

**rel. CF** – the relative cumulative frequency;  $CF/\text{the total number of VTE cases} = CF/1490$

**uniform dist** - the expected relative cumulative frequency if the cases were distribution uniformly throughout the year; January =  $1/12 = 0.0833$

**diff** – the difference between the relative cumulative frequency and the uniform cumulative frequency

To calculate the mean direction of the distribution, we need the sum of the sine and cosine components as shown in the table as “**SUM**”.

R is the resultant vector of the individual vectors and  $R^2 = S^2 + C^2$

where S and C are the sums of the sine and cosine components

hence,  $R^2 = 10.94^2 + (-88.91)^2 = 8,024.7$

therefore,  $R = 89.58$

the angle of the resultant vector,  $\theta = \arctan (S/C) = -7.01^\circ$

however, because  $C < 0$ , we must add  $180^\circ$ ; therefore  $\theta = 172.99^\circ$

this angle must now be converted to a day. The mean DOY of the distribution = June 24<sup>th</sup>

To determine the 95% confidence interval of the mean requires the second moment to be calculated

|      | <b>DOY</b> | <b>R'DOY</b> | <b>sin'DOY</b> | <b>cos'DOY</b> | <b>#VTEs</b> | <b>sin2'DOY</b> | <b>cos2'DOY</b> | <b>sum sin2</b> | <b>sum cos2</b> |
|------|------------|--------------|----------------|----------------|--------------|-----------------|-----------------|-----------------|-----------------|
| Jan  | 14.5       | 0.250        | 0.247          | 0.969          | 114          | 0.479           | 0.878           | 54.58           | 100.09          |
| Feb  | 45.5       | 0.783        | 0.706          | 0.709          | 104          | 1.0000          | 0.004           | 104.00          | 0.45            |
| Mar  | 73.5       | 1.265        | 0.954          | 0.301          | 119          | 0.574           | -0.819          | 68.28           | -97.46          |
| Apr  | 104.5      | 1.799        | 0.974          | -0.226         | 139          | -0.441          | -0.898          | -61.23          | -124.79         |
| May  | 134.5      | 2.315        | 0.735          | -0.678         | 126          | -0.997          | -0.082          | -125.58         | -10.29          |
| June | 165.5      | 2.849        | 0.288          | -0.957         | 136          | -0.552          | 0.834           | -75.13          | 113.36          |
| July | 195.5      | 3.365        | -0.222         | -0.975         | 153          | 0.433           | 0.901           | 66.22           | 137.93          |
| Aug  | 226.5      | 3.899        | -0.687         | -0.727         | 137          | 0.998           | 0.056           | 136.79          | 7.66            |
| Sept | 257.5      | 4.433        | -0.961         | -0.276         | 111          | 0.531           | -0.848          | 58.91           | -94.08          |
| Oct  | 287.5      | 4.949        | -0.972         | 0.235          | 117          | -0.456          | -0.890          | -53.34          | -104.13         |
| Nov  | 318.5      | 5.483        | -0.718         | 0.696          | 131          | -1.000          | -0.030          | -130.94         | -3.94           |
| Dec  | 348.5      | 5.999        | -0.280         | 0.960          | 103          | -0.538          | 0.843           | -55.41          | 86.82           |
|      |            |              |                |                |              |                 | <b>SUM</b>      | <b>-12.87</b>   | <b>11.62</b>    |

The resultant vector of the second moment,  $R_2 = \sqrt{(-12.87^2 + 11.62^2)} = 17.34$

The sample's circular dispersion,  $\delta = (1 - R_2/n) / [2 (R/n)^2] = 136.7$

The circular standard error,  $\sigma$ , is calculated from  $\sigma^2 = \delta/n$  and therefore  $\sigma = 0.303$

The 95% confidence interval is given by mean + arcsin (1.96 \*  $\sigma$ ) and mean - arcsin (1.96 \*  $\sigma$ ) = mean  $\pm$  36.43°

After combining this with the mean angle calculated above and then converting to DOY, the 95% confidence interval is May 19<sup>th</sup> to July 31<sup>st</sup>

**For Kuiper's test**, the test statistic,  $k$ , is calculated as  $n^{1/2} (D^+ + D^-)$ , where  $n$  is the sample size and  $D^+$  and  $D^-$  are the absolute values of the largest positive and negative differences between the observed relative cumulative frequency distribution and the uniform cumulative frequency distribution. These latter values are shown in the column labeled "diff" and, in this case are  $D^+ = 0.0233$  and  $D^- = 0.0238$ .

$$\text{therefore, } k = 1490^{1/2} (0.0233 + 0.0238) = 1.818$$

from published tables, the corresponding  $P$ -value is between 0.02 and 0.05

**For the Rayleigh test**,  $P = \exp(-Z)$ ; where  $Z = R^2/n$

$$\text{therefore, } P = 0.0046$$

**For the periodic regression**, a transformation of the data is done; i.e., taking the sine and cosine of the DOY. Then, a multiple regression analysis is performed with  $X_1 = \sin' \text{DOY}$ ;  $X_2 = \cos' \text{DOY}$ ;  $Y = \text{VTE cases}$

The multiple regression equation is of the general form

$$Y = a + b_1 X_1 + b_2 X_2$$

$a = 124.2$  – this is the periodic mean and the values of  $b$  are as indicated below.

The values listed as  $B$  are the standardized regression weights.

|       | <b>b</b>                         | <b>B</b> | <b>B x r<sub>xy</sub></b> |
|-------|----------------------------------|----------|---------------------------|
| $X_1$ | 0.533                            | 0.0256   | 0.0006                    |
| $X_2$ | -15.5121                         | -0.7414  | 0.5496                    |
|       | Multiple $R^2 = 0.5502$          |          |                           |
|       | Adjusted Multiple $R^2 = 0.4503$ |          |                           |

**ANOVA Table**

| <b>Source</b>     | <b>SS</b> | <b>df</b> | <b>MS</b> | <b>F</b> | <b>P</b> |
|-------------------|-----------|-----------|-----------|----------|----------|
| <b>Regression</b> | 1439.2522 | 2         | 719.6261  | 5.51     | 0.0274   |
| <b>Residual</b>   | 1176.4145 | 9         | 130.7127  |          |          |
| <b>Total</b>      | 2615.6667 | 11        |           |          |          |

Therefore the equation of the periodic regression is,  $\text{VTE} = 124.2 + 0.533 * \sin' \text{DOY} - 15.512 * \cos' \text{DOY}$

The amplitude of the wave =  $\sqrt{(0.533^2 + 15.512^2)} = 15.52$

The phase angle =  $\arctan(X_1/X_2) = -1.97^\circ$  then, because  $X_2$  is negative, add  $180^\circ$  and convert to DOY

Therefore, phase angle (the peak of the wave) occurs on June 30<sup>th</sup>

These calculations are described in greater detail in; **Bell KNI** (2008) Analysing cycles in biology & medicine - a practical introduction to circular variables & periodic regression. St. John's, Newfoundland, Canada: Razorbill Press. **Fisher NI** (1995) Statistical analysis of circular data. Cambridge, UK: Cambridge University Press. **Batchelet E** (1981) Circular Statistics in Biology. London, UK: Academic Press.
